# Supplementary material
Source: MDPI journal article supplement (https://www.mdpi.com/2071-1050/13/11/6378)
Supplement: s1 [file s1]

# SUPPLEMENTARY MATERIALS

**Table S1.** *Top 10 most cited countries in the study field.*

| Rank | Country       | Documents | Citations count |
|------|---------------|-----------|-----------------|
| 1    | Turkey        | 195       | 6,940           |
| 2    | China         | 161       | 5,618           |
| 3    | United States | 90        | 3,970           |
| 4    | Iran          | 155       | 3,866           |
| 5    | Australia     | 62        | 3,056           |
| 6    | Greece        | 60        | 2,162           |
| 7    | Croatia       | 48        | 1,758           |
| 8    | Spain         | 60        | 1,751           |
| 9    | Italy         | 81        | 1,733           |
| 10   | Canada        | 51        | 1,642           |

**Table S2.** *Detail of the Keywords with the highest Co-occurrence.*

| Cluster | Keywords                                               | Tematic area              | Citations |
|---------|--------------------------------------------------------|---------------------------|-----------|
| #9      | Natural zeolite, acid treatment, microstructure        | AW treatment with NZ      | 690       |
| #4      | Adsorption, kinetic, isotherm, equilibrium             | Kinetic of adsorption     | 393       |
| #5      | Zeolite, nitrogen, sediment, remediation. phosphorus   | NZ soil remediation       | 392       |
| #3      | Purification, water quality, clinoptilolite, mordenite | NZ water purification     | 379       |
| #1      | Copper, lead,zinc,arsenic                              | Metal removal             | 258       |
| #2      | Wastewater, removal,ammonium,silver                    | Urban WW treatment        | 209       |
| #6      | Heavy metal, chabazite, philipsite                     | NZ HM adsorption          | 154       |
| #10     | Ion Exchange, selectivity, ammonia removal             | Ammonia selectivity by IE | 132       |
| #8      | Water treatment, drinking water, ammonium removal      | NZ use in DW              | 66        |
| #7      | Degradation, cation exchange, stabilization            | NZ use in SD              | 45        |
| #11     | Ammonia, adsorption capacity                           | Ammonia AC by NZ          | 40        |

HM: Heavy Metals; WW: WasteWater; SD: Soil Degradation; DW: Drinking Water; AW: Acid Water; IE: Ion Exchange; AC: Adsorption Capacity and NZ: Natural Zeolites.

**Table S3.** *Detail of the authors with the highest Co-citation.*

| Cluster | Authors                                      | Tematic area                                   | Citations |
|---------|----------------------------------------------|------------------------------------------------|-----------|
| #1      | Wang, S., Wang, Y., Li, Y.                   | Ion removal<br>in aqueous<br>media             | 11,447    |
| #2      | Loizidou, M., Inglezakis, V.J., Ho, Y.S.     | Ion exchange<br>of<br>clinoptilolite           | 8,402     |
| #3      | Mumpton, F.A., Breck, D.W., Misaelides, P.   | Properties<br>and<br>applications<br>of the NZ | 7,015     |
| #4      | Borja, R., Sanchez, E., Buszewski, B.        | NZ livestock<br>applications                   | 5,289     |
| #7      | Bowman, R.S., Li, Z., Langella, A.           | Sorption<br>kinetics of the<br>NZ              | 2,835     |
| #6      | Colella, C., Shekarchi, M., Ahmadi, B.       | NZ<br>applications<br>in<br>construction       | 2,525     |
| #5      | Olguin, M.T., Hrenovic, J., Solache-Rios, M. | Sorption<br>processes<br>with NZ               | 2,167     |
| #8      | Ming, D.W., Passaglia, E., Rehakova, M.      | Agricultural<br>uses of the<br>NZ              | 748       |
| #9      | Nizami, A.S., Rehan, M., Barakat, M.A.       | NZ applied<br>to energy<br>recovery            | 463       |
| #10     | Rottinghaus, G.E., Oguz, H., Harvey, R.B.    | Adsorption<br>of organic<br>compounds<br>by NZ | 222       |

NZ: Natural Zeolite

**Table S4.** Detail of the journals with the highest number of citations.

| Cluster | Thematic area                           | Most cited Journal                                                         | Citations |
|---------|-----------------------------------------|----------------------------------------------------------------------------|-----------|
| #2      | Technologies applied to the environment | Water Research, Bioresource Technology, Environmental Science & Technology | 7,637     |
| #1      | Catalysis of materials                  | Microporous and Mesoporous Materials, Journal of Catalysis                 | 6,284     |
| #6      | Materials and methods of separation     | Journal of Hazardous Materials, Separation and Purification Technology     | 3,911     |
| #3      | Chemical processes and environment      | Chemical Engineering Journal, Desalination                                 | 3,650     |
| #5      | Construction waste management           | Applied Clay Science, Construction and Building Materials                  | 2,274     |
| #4      | Energy and Waste Management             | Industrial & Engineering Chemistry Research, Waste Management              | 1,437     |
